# Supplementary material for: Novel tropolones induce the unfolded protein response pathway and apoptosis in multiple myeloma cells
Source: PubMed Central journal article supplement (PMC5652688; doi:10.18632/oncotarget.18543), 2017-06-16
Supplement: oncotarget-08-76085-s001.pdf [file oncotarget-08-76085-s001.pdf]

# Novel tropolones induce the unfolded protein response pathway and apoptosis in multiple myeloma cells

## SUPPLEMENTARY MATERIALS

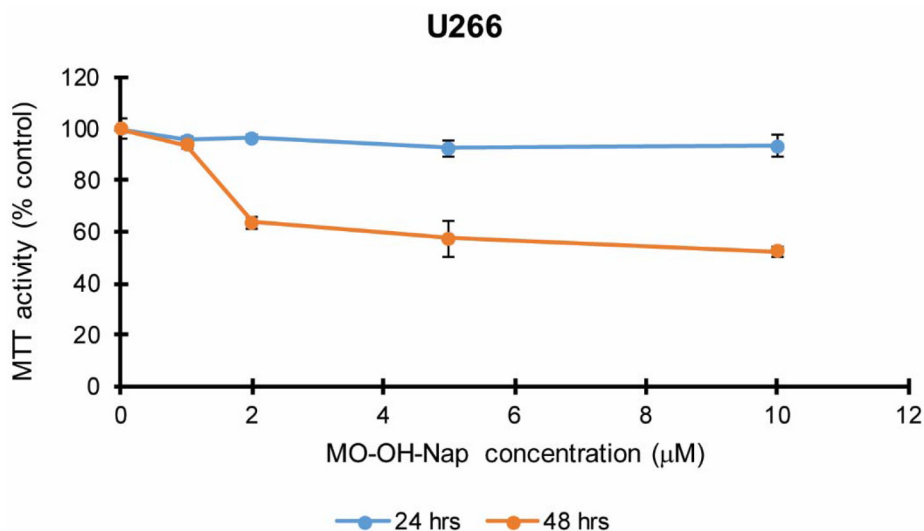

**Supplementary Figure 1: Cytotoxic effects of MO-OH-Nap in U266 cells.** U266 cells were incubated in the presence or absence of MO-OH-Nap or DMSO (solvent control) for 24 or 48 hours. MTT assays were performed. Data are expressed as percentage of control (mean ± standard deviation, *n* = 4).

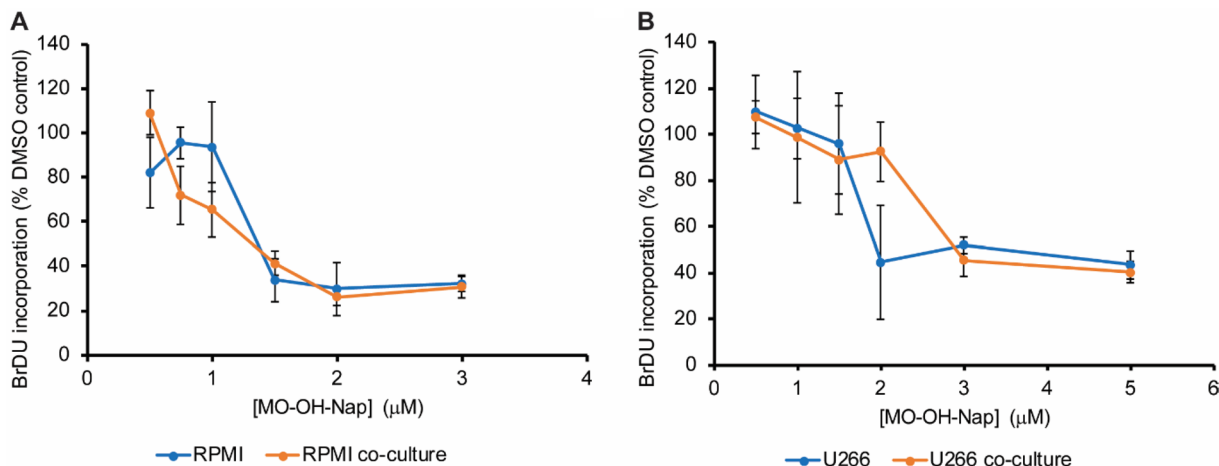

**Supplementary Figure 2: MO-OH-Nap treatment slows cellular proliferation in myeloma cell lines.** BrdU incorporation was measured following a 48-hour incubation with MO-OH-Nap in RPMI-8226 (A) and U266 (B) cells cultured alone or in the presence of HS-5 bone marrow stromal cells. Data are expressed as percentage of control (mean ± standard deviation, *n* = 4).

## U266

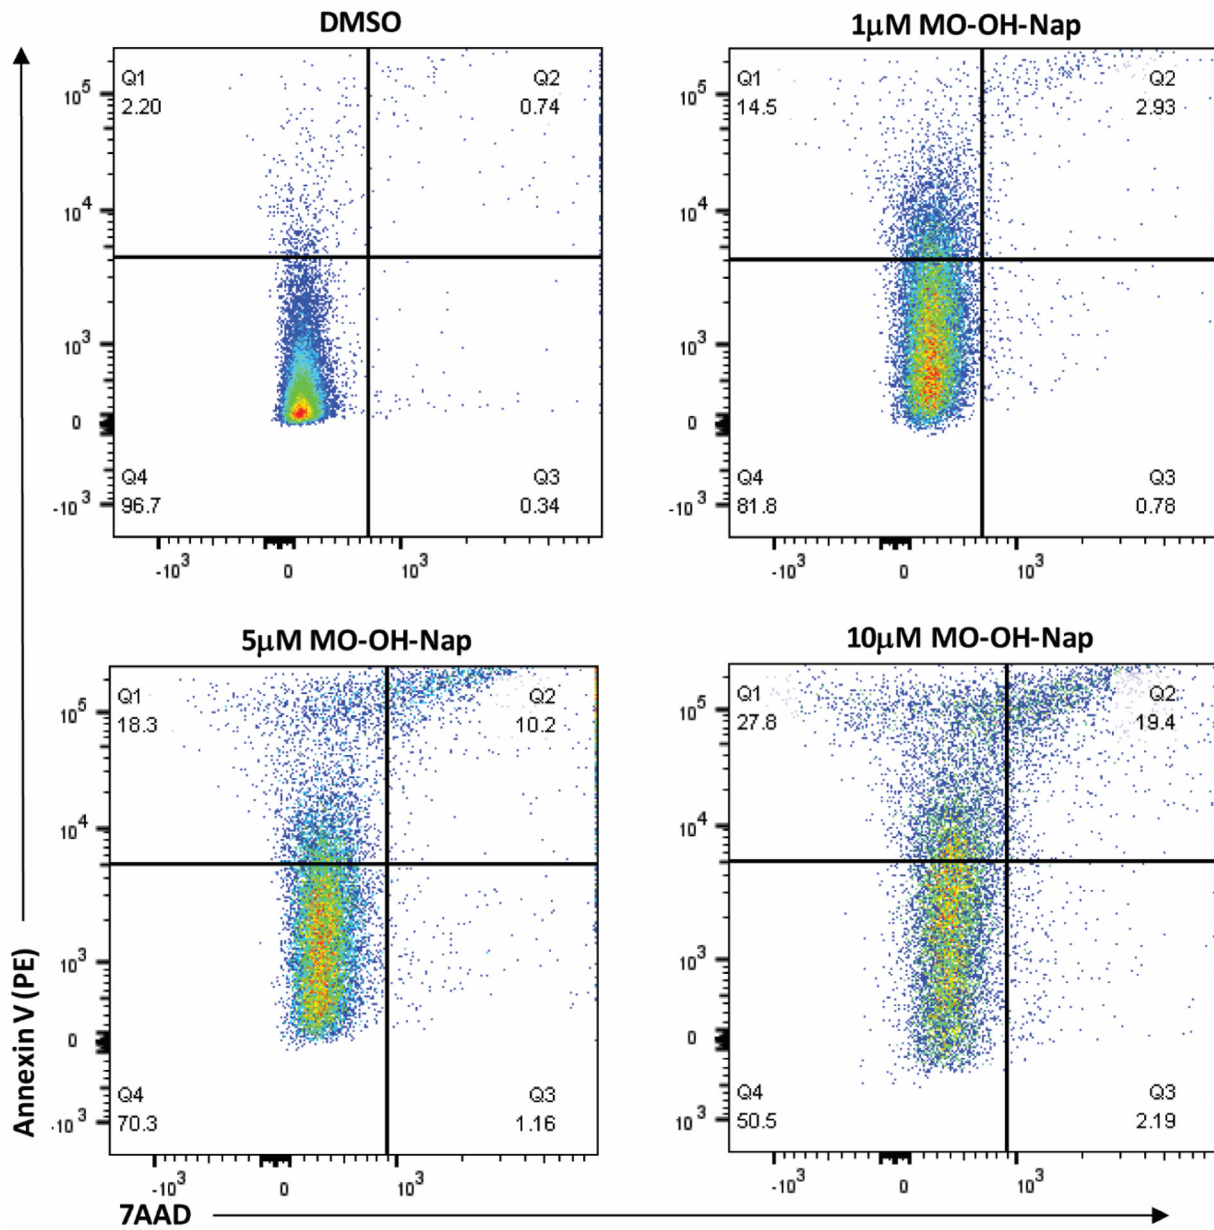

**Supplementary Figure 3: Representative example of Annexin V and 7-AAD staining by flow cytometry.** U266 cells were treated with DMSO (solvent control) or MO-OH-Nap (1 μM, 5 μM, or 10 μM) for 48 hours and then stained with PE-conjugated Annexin V and 7AAD and analyzed by flow cytometry. The percentage of cells in each quadrant are shown. Quadrant Q1 represents early apoptotic cells, Q2 represents late apoptotic/dead cells, Q3 represents dead cells, and Q4 represents live cells.

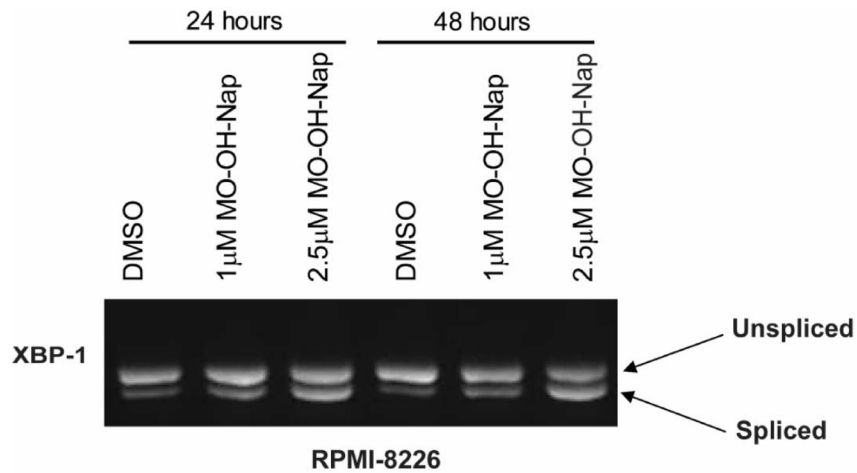

**Supplementary Figure 4: MO-OH-Nap induces XBP-1 splicing in RPMI-8266 cells.** RPMI-8226 cells were incubated for 24 or 48 hours with DMSO (solvent control) or MO-OH-Nap (1 μM or 2.5 μM). RNA was isolated, cDNA prepared, and PCR was performed using XBP-1-specific primers. The upper band represents unspliced XBP-1 and the lower band represents spliced XBP-1.

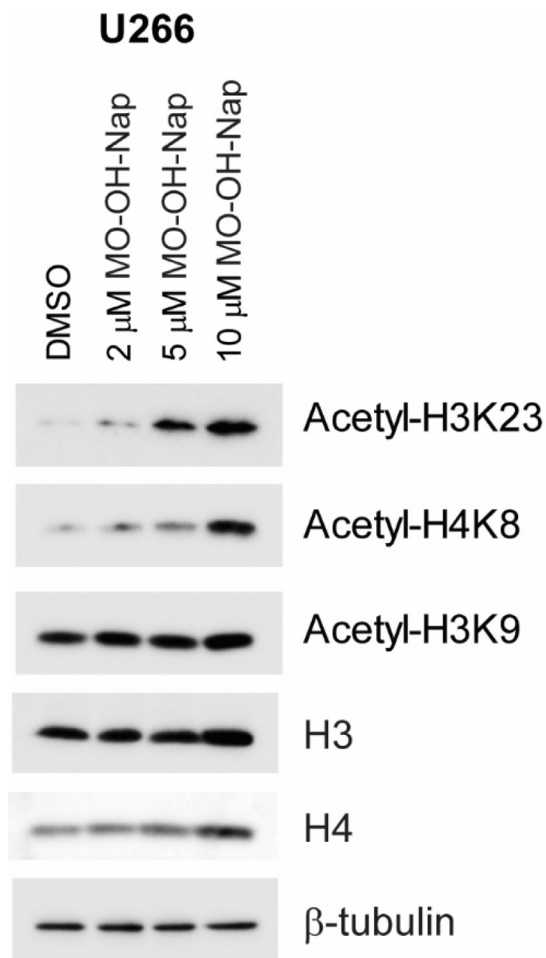

**Supplementary Figure 5: Effects of MO-OH-Nap on histone acetylation.** U266 cells were incubated for 48 hours in the presence or absence of varying concentrations of MO-OH-Nap. Immunoblot analysis for acetylated H3K23, H4K8, H3K9, total Histone H3, and total Histone H4 was performed as well as β-tubulin as a loading control.

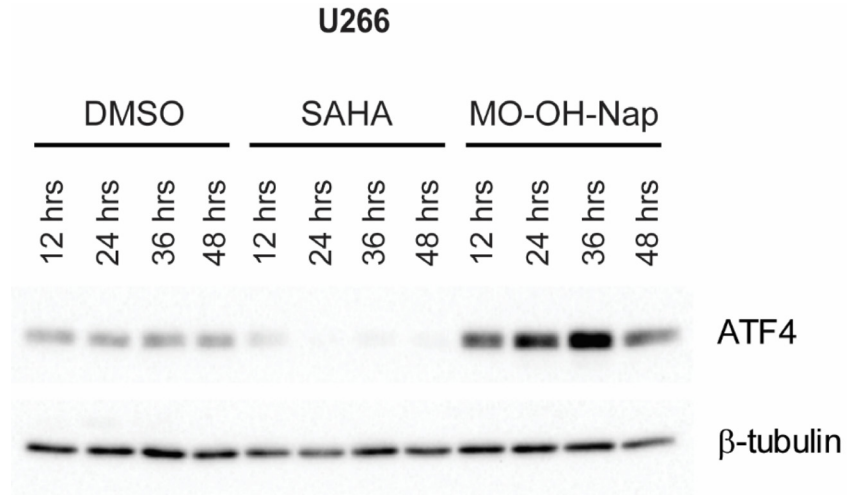

**Supplementary Figure 6: MO-OH-Nap induces ATF4 expression.** U266 cells were incubated in the presence or absence of SAHA (1  $\mu$ M) or MO-OH-Nap (10  $\mu$ M) for 12–48 hours. Immunoblot analysis of ATF4 was performed along with  $\beta$ -tubulin as a loading control.

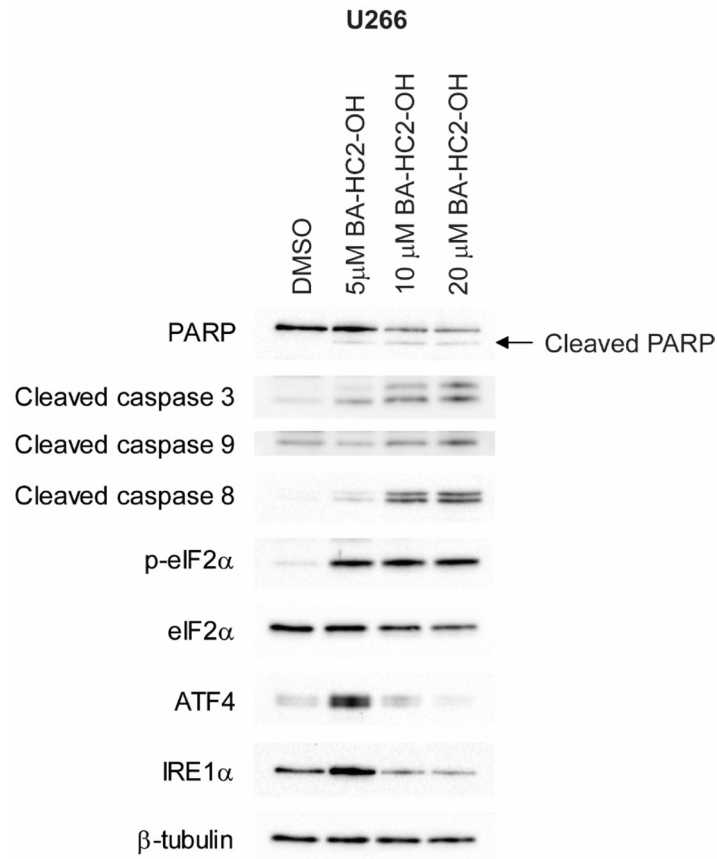

**Supplementary Figure 7: BA-HC2-OH induces markers of apoptosis and ER stress/UPR.** U266 cells were incubated for 48 hours in the presence or absence of DMSO (solvent control) or BA-HC2-OH (5  $\mu$ M, 10  $\mu$ M or 20  $\mu$ M). Immunoblot analysis of PARP, cleaved caspases-3, -8 and -9, phosphorylated eIF2 $\alpha$  (p-eIF2 $\alpha$ ), eIF2 $\alpha$ , ATF4, and IRE1 $\alpha$  was performed along with  $\beta$ -tubulin as a loading control.

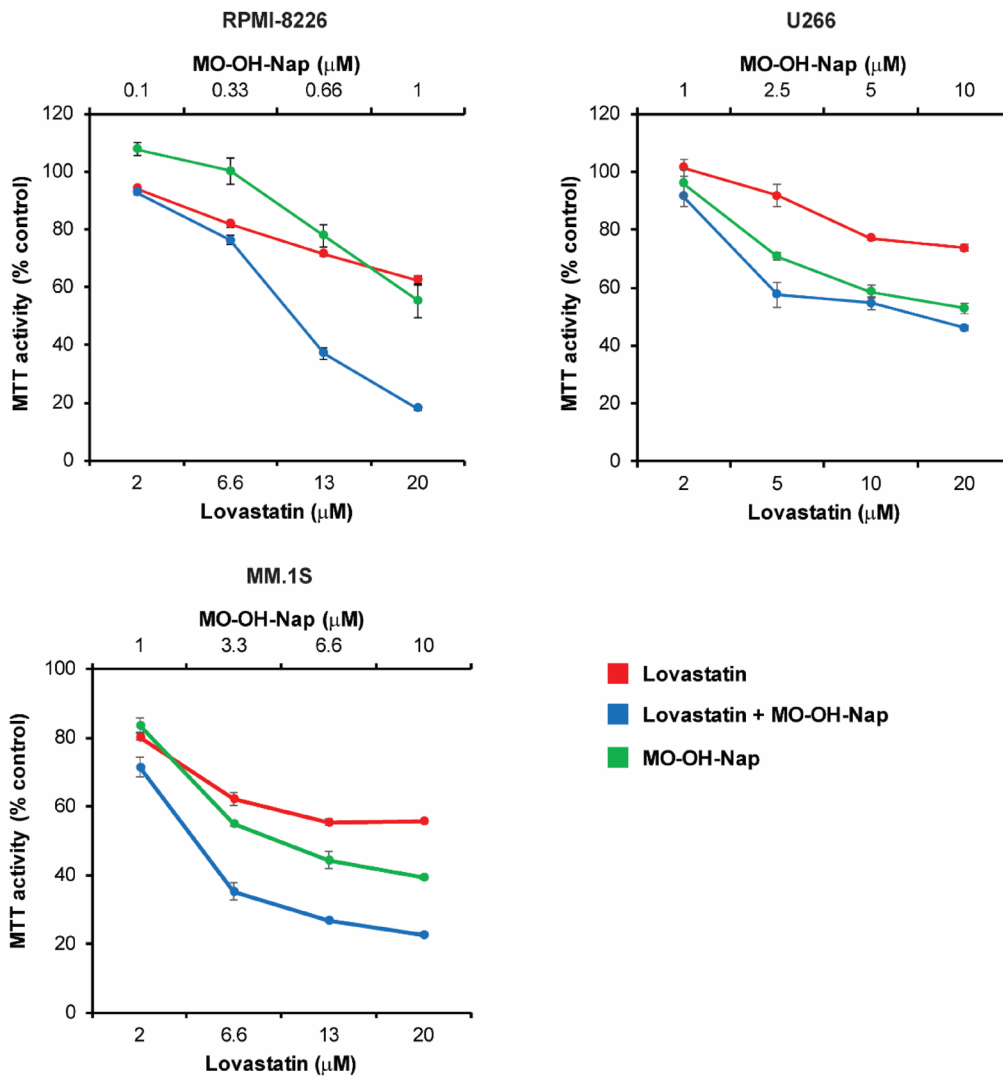

**Supplementary Figure 8: Interaction between MO-OH-Nap and lovastatin.** Three myeloma cell lines were incubated in the presence or absence of MO-OH-Nap and/or lovastatin. MTT assays were performed. Data are expressed as percentage of control (mean  $\pm$  standard deviation,  $n = 4$ ).

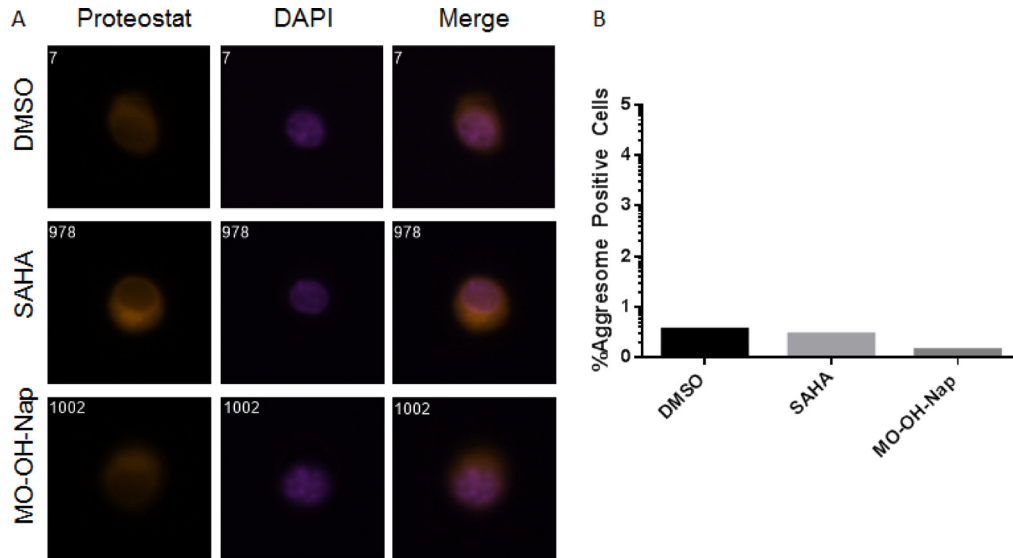

**Supplementary Figure 9: MO-OH-Nap does not impact aggresome formation.** U266 cells were treated for 24 hours with 1  $\mu$ M SAHA or 10  $\mu$ M MO-OH-Nap. Aggresome staining was performed as described in the Materials and Methods. Cells were gated as aggresome-positive for fluorescence intensities that were low Proteostat intensity in the nucleus and high Proteostat intensity outside the nucleus, indicating a perinuclear aggresome versus aggregates dispersed throughout the cell. Representative cells are shown in (A) and the analyzed data in (B).

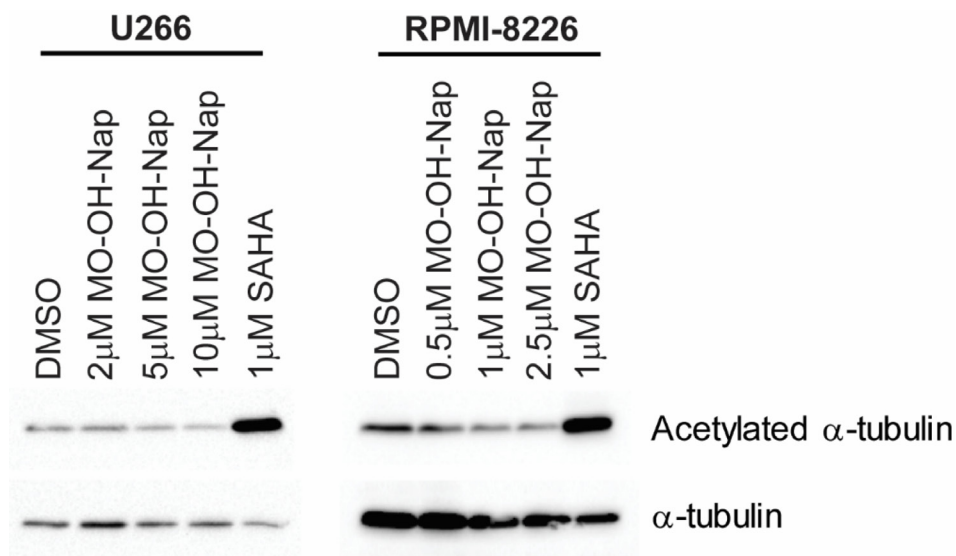

**Supplementary Figure 10: Incubation with MO-OH-Nap does not alter levels of acetylated alpha-tubulin.** U266 and RPMI-8226 cells were incubated for 48 hours in the presence or absence of DMSO (solvent control), MO-OH-Nap or SAHA (positive control). Immunoblot analysis of acetylated alpha-tubulin and alpha-tubulin (loading control) was performed.

**Supplementary Table 1: Antibodies used for immunoblot analysis**

|                           | <b>Primary Antibody Source (catalog number) (dilution)</b> | <b>Secondary Antibody Source (catalog number) (dilution)</b> |
|---------------------------|------------------------------------------------------------|--------------------------------------------------------------|
| Acetylated-alpha tubulin  | Cell Signaling (5335T) (1:1000)                            | Amersham (NA934) (1:1000)                                    |
| Alpha-tubulin             | Abcam (EP1332Y) (1:25,000)                                 | Amersham (NA934) (1:1000)                                    |
| ATF-4                     | Cell Signaling Technology (11815) (1:1000)                 | Amersham (NA934) (1:1000)                                    |
| Acetyl-Histone H4 (Lys8)  | Cell Signaling Technology (2594) (1:1000)                  | Amersham (NA934) (1:1000)                                    |
| Acetyl-Histone H3 (Lys9)  | Cell Signaling Technology (9469) (1:3000)                  | Amersham (NA934) (1:1000)                                    |
| Acetyl-Histone H3 (Lys23) | Cell Signaling Technology (14932) (1:1000)                 | Amersham (NA934) (1:1000)                                    |
| Cleaved caspase 3         | Cell Signaling Technology (9664) (1:500)                   | Amersham (NA934) (1:1000)                                    |
| Cleaved caspase 9         | Cell Signaling Technology (9501) (1:500)                   | Amersham (NA934) (1:1000)                                    |
| Cleaved caspase 8         | Cell Signaling Technology (9496) (1:500)                   | Amersham (NA934) (1:1000)                                    |
| eIF2 $\alpha$             | Cell Signaling Technology (9722) (1:1000)                  | Amersham (NA934) (1:2000)                                    |
| Histone H3                | Cell Signaling Technology (9715S)                          | Amersham (NA934) (1:1000)                                    |
| Histone H4                | Abcam (177840)                                             | Amersham (NA934) (1:1000)                                    |
| Phospho-eIF2a             | Cell Signaling Technology (3597) (1:1000)                  | Amersham (NA934) (1:1000)                                    |
| IRE1 $\alpha$             | Cell Signaling Technology (3294) (1:2000)                  | Amersham (NA934) (1:2000)                                    |
| PARP                      | Santa Cruz (sc-7150) (1:10,000)                            | Amersham (NA934) (1:2000)                                    |
| PERK                      | Santa Cruz (sc-13073) (1:500)                              | Amersham (NA934) (1:1000)                                    |
| $\beta$ -tubulin          | Sigma (T5201) (1:40000)                                    | Amersham (NA931) (1:1000)                                    |

All primary and secondary antibodies used for western blot analysis are shown. All primary antibodies were incubated at 4°C overnight. All second antibodies were incubated at room temperature for one hour.

## Supplementary Table 2: Ingenuity pathway analysis: upstream analysis

### MOOH-24 hr vs Control

| Molecule | Prediction | z-score | p-value  |
|----------|------------|---------|----------|
| HIF1A    | Activated  | 3.944   | 1.38E-21 |
| TP53     | Activated  | 1.956   | 2.15E-18 |
| ATF4     | Activated  | 3.251   | 1.17E-16 |
| EPAS1    | Activated  | 2.55    | 1.06E-15 |
| IL2      | Activated  | 1.854   | 2.24E-15 |
| Hdac     | Inhibited  | -2.905  | 6.43E-05 |

### MOOH-48hr vs Control

| Molecule | Prediction | z-score | p-value  |
|----------|------------|---------|----------|
| XBP1     | Activated  | 4.371   | 9.28E-27 |
| ATF4     | Activated  | 4.214   | 6.19E-24 |
| TP53     | Activated  | 2.29    | 1.31E-23 |
| EIF2AK3  | Activated  | 2.099   | 1.02E-20 |
| ATF6     | Activated  | 2.275   | 8.88E-12 |
| Hdac     | Inhibited  | -3.359  | 5.53E-50 |

### Saha-24hr vs Control

| Molecule | Prediction | z-score | p-value  |
|----------|------------|---------|----------|
| TP53     | Activated  | 4.704   | 9.26E-24 |
| MYC      | Inhibited  | -3.844  | 6.46E-19 |
| CDKN1A   | Activated  | 2.167   | 9.18E-16 |
| TGFB1    | Activated  | 3.028   | 1.21E-15 |
| TBX2     | Inhibited  | -2.867  | 1.79E-15 |
| Hdac     | Inhibited  | -2.737  | 1.19E-04 |

Differentially expressed genes were analyzed using Ingenuity Pathway Analysis. The top hit for “Upstream Analysis” are shown, as well as their predicted activation or inhibition and the associated Z-score and p-value of the analysis. A z-score > | 1.5 | and a p-value < 0.05 were considered significant.

## Supplementary Table 3: Combination indices from isobologram analysis of MTT cytotoxicity assays

|                               | RPMI-8226                                          | U266                                               | MM.1S                                              |
|-------------------------------|----------------------------------------------------|----------------------------------------------------|----------------------------------------------------|
| <b>Bortezomib + MO-OH-Nap</b> | IC <sub>30</sub> : 0.45<br>IC <sub>50</sub> : 0.72 | IC <sub>30</sub> : 0.65<br>IC <sub>50</sub> : 0.73 | IC <sub>30</sub> : 0.32<br>IC <sub>50</sub> : 0.69 |
| <b>Lovastatin + MO-OH-Nap</b> | IC <sub>30</sub> : 0.56<br>IC <sub>50</sub> : 0.31 | IC <sub>30</sub> : 1.0<br>IC <sub>50</sub> : 1.2   | IC <sub>30</sub> : 0.84<br>IC <sub>50</sub> : 0.63 |

Combination indices (CI) for the IC<sub>30</sub> and IC<sub>50</sub> values for MM cells treated with either a combination of bortezomib + MO-OH-Nap or Lovastatin + MO-OH-Nap are shown. As per Chou and Talalay, a CI <1 represents a synergistic interaction, CI = 1 represents an additive interaction and CI >1 represents an antagonistic interaction.



**Supplementary Table 4: Primer sequences used for XBP-1 PCR and qRT-PCR**

|                                 | <b>Forward:</b>          | <b>Reverse:</b>           |
|---------------------------------|--------------------------|---------------------------|
| <b>CHOP</b>                     | TCTTCACCACTCTTGACCCTGCTT | GTTCTTTCTCCTTCATGCGCTGCT  |
| <b><math>\beta</math>-actin</b> | ACGTTGCTATCCAGGCTGTGCTAT | TTAATGTCACGCACGATTTCCTCGC |
| <b>XBP-1</b>                    | GTTGAGAACCAGGAGTTAAGACAG | CAGAGGGTATCTCAAGACTAGG    |
